# Supplementary material
Source: PubMed Central journal article supplement (PMC3504630)
Supplement: NIHMS389042-supplement-01.pdf [file NIHMS389042-supplement-01.pdf]

| <b>Table 1. Demographic, Genotype, and Ocular Status of Study Participants (n=249) at Study Baseline</b> |                                                         |           |
|----------------------------------------------------------------------------------------------------------|---------------------------------------------------------|-----------|
| <b>Age, years, mean±SD</b>                                                                               |                                                         | 33.3±13.5 |
| <b>Sex, n (%)</b>                                                                                        | Male                                                    | 121(49%)  |
|                                                                                                          | Female                                                  | 128(51%)  |
| <b>Race (self-reported), n (%)</b>                                                                       | Asian                                                   | 3(1%)     |
|                                                                                                          | Black                                                   | 6(2%)     |
|                                                                                                          | Hispanic                                                | 15(6%)    |
|                                                                                                          | White                                                   | 222(90%)  |
|                                                                                                          | Other                                                   | 3(3%)     |
| <b>Genotype category of germline VHL mutation, n (%)</b>                                                 | Total genotyped                                         | 240(96%)  |
|                                                                                                          | Missense mutations                                      | 115(48%)  |
|                                                                                                          | Protein-truncating mutations                            | 101(42%)  |
|                                                                                                          | Complete gene deletions                                 | 12(5%)    |
|                                                                                                          | Other (splice mutations, amino acid deletion mutations) | 12(5%)    |
| <b>Ocular VHL disease, n (%)</b>                                                                         | None                                                    | 95(38%)   |
|                                                                                                          | Present                                                 | 154(62%)  |
|                                                                                                          | One eye involved                                        | 72(29%)   |
|                                                                                                          | Both eyes involved                                      | 82(33%)   |
| <b>Age of onset, years, mean±SD</b>                                                                      |                                                         | 25.2±12   |
| <b>Prior treatment for ocular VHL disease, n eyes (%)</b>                                                |                                                         | 142(29%)  |
| <b>Mean BCVA, letters, mean±SD</b>                                                                       | Better-seeing eye                                       | 85.5±11.3 |
|                                                                                                          | Worse-seeing eye                                        | 67.9±32.5 |

Key: SD = standard deviation, VHL = von Hippel-Lindau, BCVA = best corrected visual acuity
