# Supplementary material
Source: PubMed Central journal article supplement (PMC3504630)
Supplement: NIHMS389042-supplement-02.pdf [file NIHMS389042-supplement-02.pdf]

**Table 3. Risk factors for anatomical progression of ocular VHL disease during follow-up: logistic regression analyses by eye.**

| <b>Types of anatomical progression of VHL disease during follow-up</b> |                                             |                                                    |               |                                           |               | <b>Risk Factors (p-value)</b> |                                                      |                             |                             |                            |                    |                      |
|------------------------------------------------------------------------|---------------------------------------------|----------------------------------------------------|---------------|-------------------------------------------|---------------|-------------------------------|------------------------------------------------------|-----------------------------|-----------------------------|----------------------------|--------------------|----------------------|
| <b>Progression description</b>                                         | <b>Subtypes of progression</b>              | <b>Baseline status</b>                             | <b># eyes</b> | <b>Follow-up condition</b>                | <b># eyes</b> | <b>Sex</b>                    | <b>Genotypic category of germline VHL mutation**</b> | <b>Younger baseline age</b> | <b>Younger age of onset</b> | <b>Fellow eye involved</b> | <b>Ever-smoker</b> | <b>Decreased BMI</b> |
| <b>New ocular involvement</b>                                          | None to any retinal location (O, P, or O&P) | No ocular VHL disease                              | 262           | Presence of ocular VHL disease            | 58            | 0.79                          | 0.44                                                 | 0.10                        | 0.89                        | <b>0.01*</b>               | 0.90               | 0.14                 |
|                                                                        | None to O                                   | No ocular VHL disease                              | 262           | Juxtapapillary RCH only                   | 6             | 0.47                          | 0.79                                                 | 0.88                        | 0.57                        | 0.75                       | CNE                | 0.74                 |
|                                                                        | None to P                                   | No ocular VHL disease                              | 262           | Peripheral RCH only                       | 48            | 0.55                          | 0.29                                                 | 0.08                        | 0.65                        | <b>0.009*</b>              | 0.53               | 0.05                 |
|                                                                        | None to O&P                                 | No ocular VHL disease                              | 262           | Juxtapapillary and peripheral RCH         | 4             | 0.93                          | CNE                                                  | 0.23                        | 0.73                        | 0.91                       | CNE                | 0.53                 |
| <b>Increase in affected retinal locations</b>                          | All progressions to a new retinal location  | Juxtapapillary only or Peripheral only involvement | 196           | Juxtapapillary and peripheral involvement | 11            | 0.69                          | 0.58                                                 | 0.94                        | 0.71                        | 0.75                       | 0.21               | 0.24                 |
|                                                                        | O to O&P                                    | Juxtapapillary only involvement                    | 20            | Juxtapapillary and peripheral involvement | 2             | 0.77                          | CNE                                                  | 0.25                        | 0.25                        | 0.89                       | CNE                | 0.37                 |
|                                                                        | P to O&P                                    | Peripheral only involvement                        | 176           | Juxtapapillary and peripheral involvement | 9             | 0.69                          | 0.75                                                 | 0.62                        | 0.41                        | 0.63                       | 0.32               | 0.12                 |
| <b>Increased peripheral number</b>                                     |                                             | Peripheral involvement (1-2 RCH(s))                | 116           | Peripheral involvement (≥ 3 RCHs)         | 34            | 0.75                          | CNE                                                  | 0.10                        | 0.07                        | 0.06                       | 0.99               | 0.48                 |
| <b>Increased peripheral extent</b>                                     |                                             | Peripheral involvement (< 1 quadrant)              | 133           | Peripheral involvement (≥ 1 quadrant)     | 28            | 0.18                          | CNE                                                  | <b>0.001*</b>               | <b>0.007*</b>               | 0.53                       | 0.48               | 0.07                 |
| <b>New severe involvement</b>                                          |                                             | Ocular involvement, not severely affected          | 208           | Severely affected                         | 14            | 0.27                          | 0.66                                                 | <b>0.01*</b>                | <b>0.0007*</b>              | 0.24                       | 0.59               | 0.84                 |

Key: VHL = von Hippel-Lindau; RCH = retinal capillary hemangioblastoma; O = optic nerve/juxtapapillary RCH; P = peripheral RCH; BMI = body mass index; CNE = could not estimate p-value in logistic regression analysis due to small n in subgroups. \*\* indicates p-value for adjusted type 3 analysis of effects / Chi-square test for difference among multiple categorical strata
