# Supplementary material
Source: PubMed Central journal article supplement (PMC3504630)
Supplement: NIHMS389042-supplement-03.pdf [file NIHMS389042-supplement-03.pdf]

**Table 4. Risk factors for decrease in visual acuity in ocular VHL disease during study follow-up: logistic regression analyses by eye**

| Baseline status           | # eyes | Follow-up condition                   | # eyes | Risk Factors (p-value) |                                               |                      |                      |                     |             |               |                                                          |                                                               |
|---------------------------|--------|---------------------------------------|--------|------------------------|-----------------------------------------------|----------------------|----------------------|---------------------|-------------|---------------|----------------------------------------------------------|---------------------------------------------------------------|
|                           |        |                                       |        | Sex                    | Genotypic category of germline VHL mutation** | Younger baseline age | Younger age of onset | Fellow eye involved | Ever-smoker | Decreased BMI | Increased peripheral RCH number [≥ 3 RCHs vs 1-2 RCH(s)] | Increased peripheral RCH extent [≥ 1 quadrant vs <1 quadrant] |
| Visual acuity >15 letters | 454    | Visual acuity ≤15 letters (20/1000)   | 16     | 0.35                   | 0.26                                          | 0.15                 | <b>0.03*</b>         | <b>0.02*</b>        | 0.97        | 0.95          | 0.98                                                     | <b>0.002*</b>                                                 |
| Visual acuity >35 letters | 447    | Visual acuity ≤35 letters (20/200)    | 18     | 0.66                   | 0.59                                          | 0.80                 | <b>0.003*</b>        | <b>0.002*</b>       | 0.41        | 0.66          | 0.76                                                     | <b>0.001*</b>                                                 |
| All                       | 498    | Decrease in visual acuity ≥15 letters | 55     | 0.45                   | 0.65                                          | 0.14                 | 0.42                 | <b>0.01*</b>        | 0.39        | 0.90          | 0.08                                                     | <b>0.03*</b>                                                  |

Key: VHL = von Hippel-Lindau; RCH = retinal capillary hemangioblastoma; BMI = body mass index. \*\* indicates p-value for adjusted type 3 analysis of effects / Chi-square test for difference among multiple categorical strata
