# Supplementary material
Source: PubMed Central journal article supplement (PMC3504630)
Supplement: NIHMS389042-supplement-04.pdf [file NIHMS389042-supplement-04.pdf]

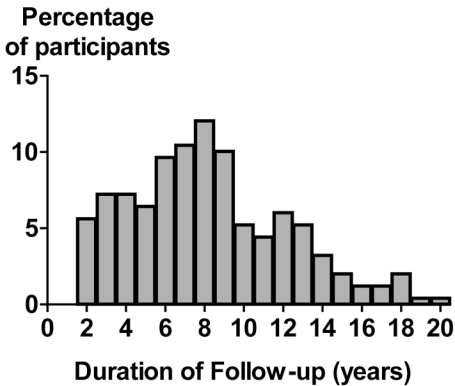

**Figure 1.** Distribution of follow-up duration for study participants. Frequency histogram of ophthalmic follow-up duration for the 249 participants in the current study. The mean follow-up time was  $8.2 \pm 4.0$  years, with a median follow-up time of 7.7 years (range 2.1 to 19.8 years).
