# Supplementary material
Source: PubMed Central journal article supplement (PMC3504630)
Supplement: NIHMS389042-supplement-05.pdf [file NIHMS389042-supplement-05.pdf]

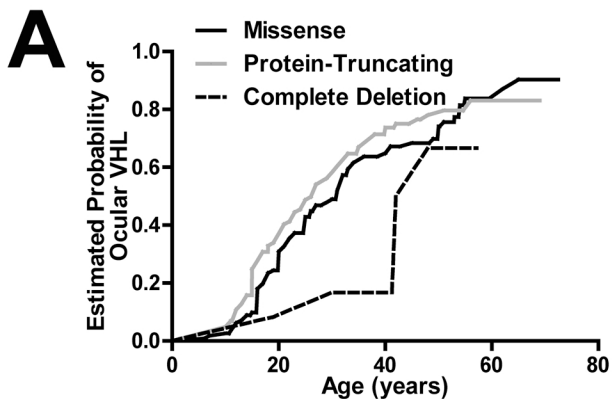

# of patients remaining in survival analysis

| Age | 0   | 20 | 40 | 60 | 80 |
|-----|-----|----|----|----|----|
| M   | 113 | 82 | 31 | 5  | 0  |
| T   | 102 | 63 | 24 | 3  | 0  |
| D   | 12  | 10 | 8  | 0  | 0  |

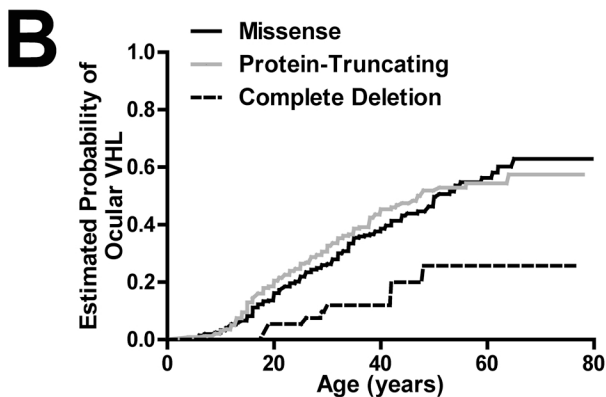

# of patients remaining in survival analysis

| Age | 0   | 20  | 40  | 60 | 80 |
|-----|-----|-----|-----|----|----|
| M   | 404 | 308 | 124 | 28 | 0  |
| T   | 343 | 248 | 94  | 22 | 0  |
| D   | 62  | 52  | 27  | 5  | 0  |

**Figure 6** Kaplan-Meier time-to-event analyses of the effect of genotype category on the probability of developing new ocular von Hippel-Lindau (VHL) disease (by patient). (A) Segregation of the study population into three genotypic categories of VHL gene germline mutation (missense (M), protein-truncating (T), and complete deletion (D)) demonstrated a lower lifetime risk of developing ocular VHL disease in patients with complete deletions compared to other mutation types ( $p=0.0097$ , Wilcoxon test). (B) Cross-sectional data from a larger cohort of patients with VHL disease ( $n=868$ ) revealed a similar significant result ( $p=0.0006$ , Wilcoxon test).
